# Supplementary material for: Abelson tyrosine-protein kinase 2 regulates myoblast proliferation and controls muscle fiber length
Source: eLife journal article supplement (doi:10.7554/elife.29905), 2017-12-12
Supplement: supp [file elife_poa_e29905_Figure_1_figure_supplement_1.pdf › elife_poa_e29905_Figure_1_figure_supplement_1.pdf]

Figure 1-figure supplement 1

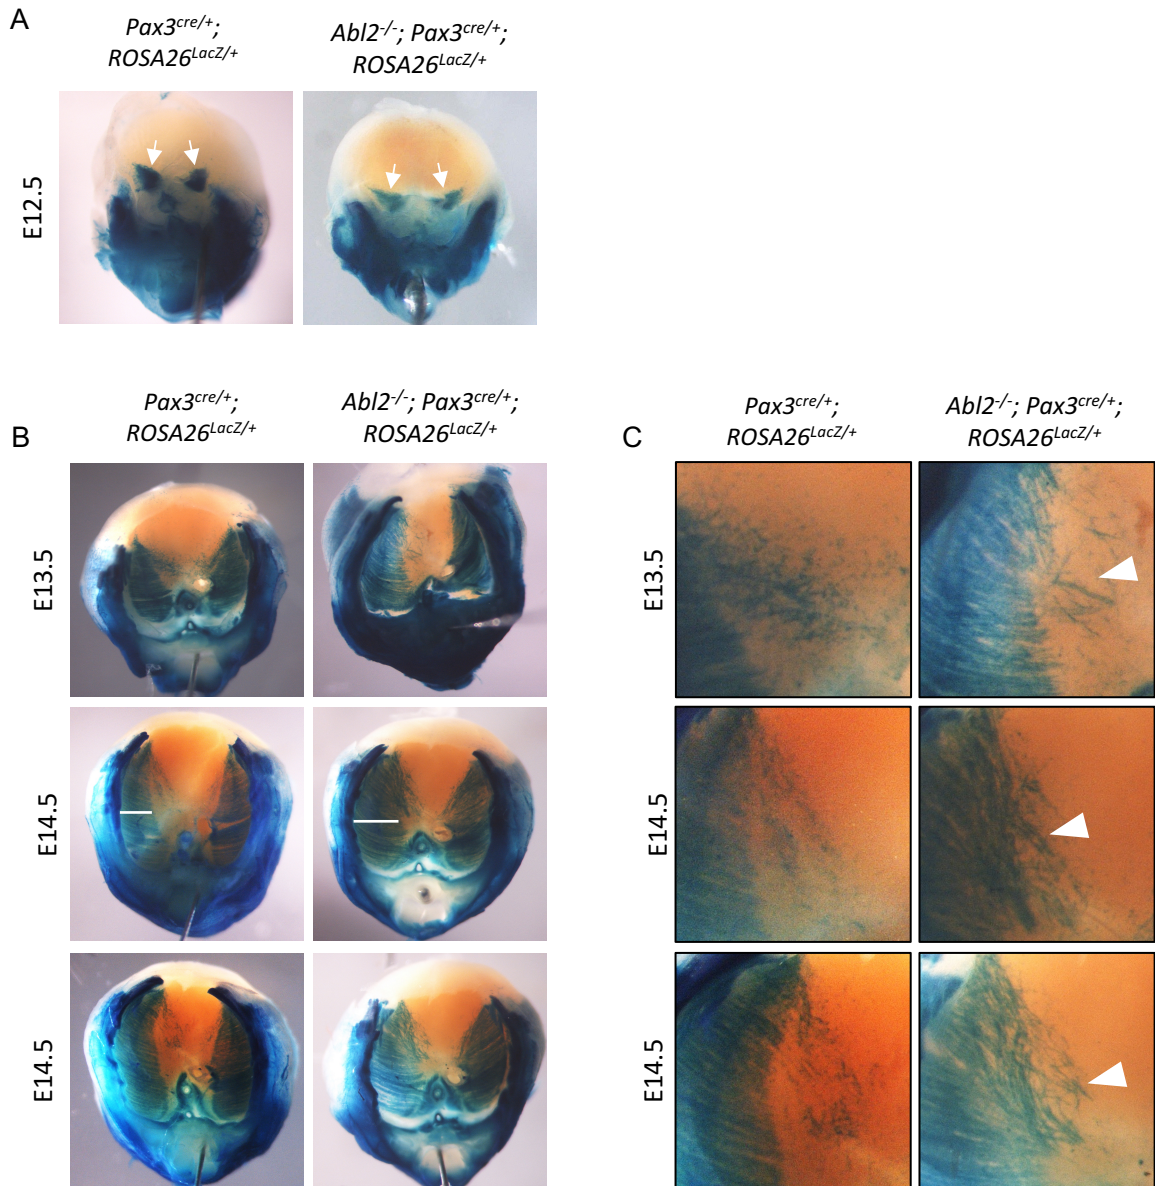

**Embryonic development of *Abl2*<sup>-/-</sup> diaphragm.** Embryos were collected between E12.5-E14.5 to detect differences in diaphragm muscle development between *Abl2* mutant and control mice.  $\beta$ -galactosidase activity was detected in myoblasts and muscle fibers from *Abl2*<sup>-/-</sup>; *Pax3*<sup>cre/+</sup>; *ROSA26*<sup>LacZ/+</sup> mutant and *Pax3*<sup>cre/+</sup>; *ROSA26*<sup>LacZ/+</sup> control littermates. (A) At E12.5, Pax3<sup>+</sup> cells accumulated at the dorsal edge of the developing diaphragm (white arrows) in both *Abl2* mutant and control mice. (B) At 14.5, the muscle domain appears larger in *Abl2* mutant mice (white line) compared to control mice. (C) Higher magnification images of the ventral left quadrant of the diaphragm from E13.5-14.5 mice. Muscle fibers begin to extend into the central tendon domain in *Abl2* mutant mice (white arrowheads), whereas muscle fibers are largely excluded from the central tendon domain in control mice.
