# Supplementary material for: Abelson tyrosine-protein kinase 2 regulates myoblast proliferation and controls muscle fiber length
Source: eLife journal article supplement (doi:10.7554/elife.29905), 2017-12-12
Supplement: supp [file elife_poa_e29905_Figure_2_figure_supplement_1.pdf › elife_poa_e29905_Figure_2_figure_supplement_1.pdf]

Figure 2-figure supplement 2

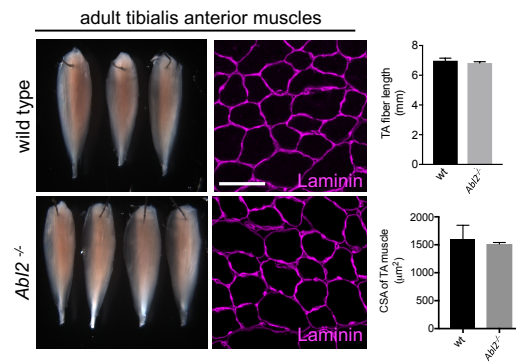

**Limb muscles appear normal in muscle length and cross-sectional area.** Hind limbs were fixed in 4% PFA, and tibialis anterior (TA) muscles were dissected at full length from 3 wild type and 3 *Abl2*<sup>-/-</sup> mice. Sections were stained with antibodies to Laminin to outline the muscle fibers. The length and cross-sectional area of *Abl2*<sup>-/-</sup> TA muscles are normal. The means  $\pm$  SEMs from the left TA muscles of 3-4 mice in each group are shown. Scale bar is 50  $\mu$ m.
