# Supplementary material for: Abelson tyrosine-protein kinase 2 regulates myoblast proliferation and controls muscle fiber length
Source: eLife journal article supplement (doi:10.7554/elife.29905), 2017-12-12
Supplement: supp [file elife_poa_e29905_Figure_4_figure_supplement_1.pdf › elife_poa_e29905_Figure_4_figure_supplement_1.pdf]

Figure 4-figure supplement 3

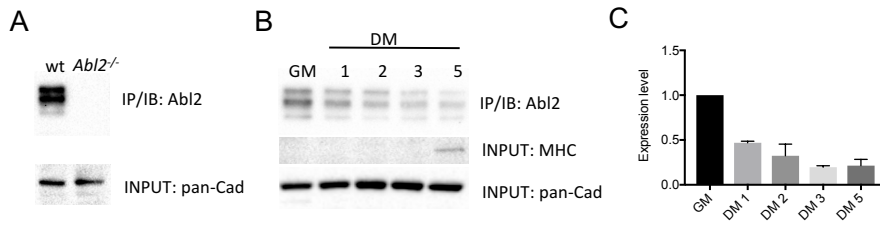

**Abl2 expression is enriched in proliferating myoblasts.** (A) Western blot analysis of wild type (wt) and *Abl2*<sup>-/-</sup> primary cultures. Cadherin levels (pan-Cad) were measured in cell lysates, and Abl2 was immunoprecipitated (IP) from lysates containing equal levels of pan-Cad in wt and *Abl2*<sup>-/-</sup> primary cultures to validate the IP and immunoblotting (IB) antibodies. (B) C2C12 cells collected at sequential time points during differentiation. Abl2 was immunoprecipitated from lysates of C2C12 cultures grown in growth medium (GM) or in differentiation medium (DM) for the indicated number of days. Abl2 is highly expressed in C2C12 cells in growth media and migrates as 3 distinct bands between 100-150 kDa. (C) Abl2 expression declines during differentiation. Abl2 expression in GM was assigned a value of 1.0, and all other values are expressed relative to GM.
