# Supplementary material for: Abelson tyrosine-protein kinase 2 regulates myoblast proliferation and controls muscle fiber length
Source: eLife journal article supplement (doi:10.7554/elife.29905), 2017-12-12
Supplement: supp [file elife_poa_e29905_Figure_5_figure_supplement_1.pdf › elife_poa_e29905_Figure_5_figure_supplement_1.pdf]

Figure 5-figure supplement 4

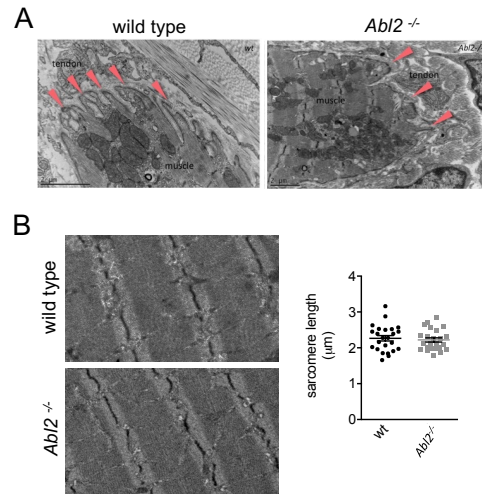

**Ultrastructural appearance of muscle-tendon junctions and muscle fibers is normal in *Abi2* mutant mice.** (A) Deep muscle membrane specializations form at the myotendinous junction in wild type and *Abi2*<sup>-/-</sup> mice. (B) The scatter plot shows the sarcomere lengths for 12 fibers from two wild type and two *Abi2*<sup>-/-</sup> mice. The mean  $\pm$  SEMs are also shown.
