# Supplementary material for: Abelson tyrosine-protein kinase 2 regulates myoblast proliferation and controls muscle fiber length
Source: eLife journal article supplement (doi:10.7554/elife.29905), 2017-12-12
Supplement: supp [file elife_poa_e29905_Figure_8_figure_supplement_1.pdf › elife_poa_e29905_Figure_8_figure_supplement_1.pdf]

Figure 8-figure supplement 6

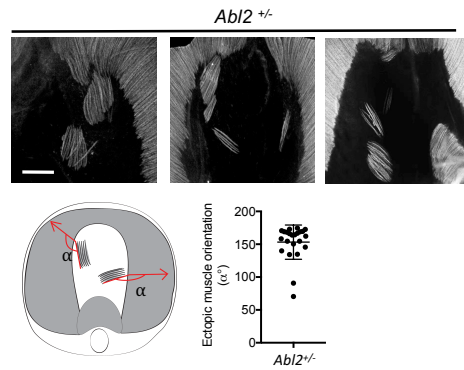

**The orientation of ectopic muscle fibers correlates with the orientation of myofibers in the nearby main costal diaphragm muscle.** Representative images of the central tendon area in whole mounts of the diaphragm from *Abi2*<sup>+/-</sup> mice. The cartoon shows the method for measuring and quantifying the orientation of myofibers in ectopic muscle islands, compared to myofibers in the nearest costal diaphragm. The scatter plot shows the angle of each ectopic island in relation to the orientation of the myofibers in the nearest costal diaphragm muscle. The mean value and  $\pm$  s.d. are shown. Scale bar is 500  $\mu$ m.
